# Supplementary material for: CD147 regulates extrinsic apoptosis in spermatocytes by modulating NFκB signaling pathways
Source: PubMed Central journal article supplement (PMC5356870; doi:10.18632/oncotarget.13624), 2016-11-25
Supplement: oncotarget-08-3132-s001.pdf [file oncotarget-08-3132-s001.pdf]

## CD147 regulates extrinsic apoptosis in spermatocytes by modulating NF $\kappa$ B signaling pathways

### SUPPLEMENTARY FIGURES AND TABLE

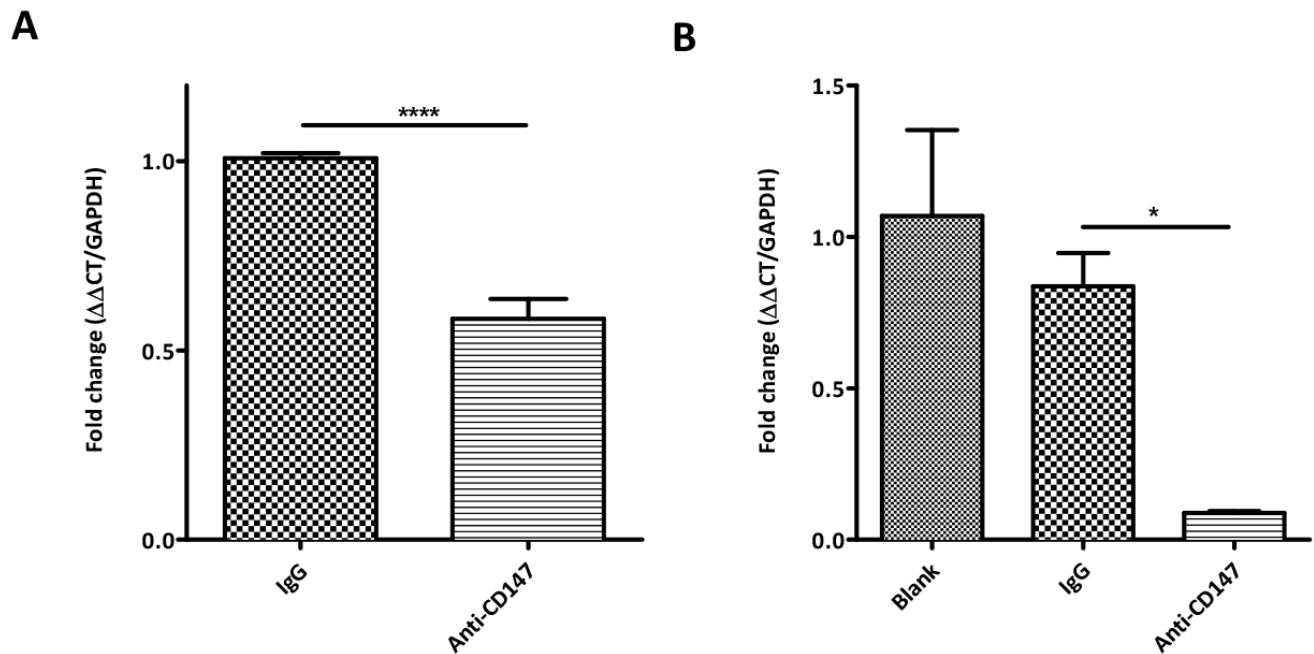

Supplementary Figure S1: Real-time PCR analysis of TRAF2 in CD147-immunodepleted testis of SCID mouse (A) and anti-CD147 treated GC-2 cells (B). The experiments were repeated 3 times. Values represent the mean $\pm$ SEM. \*,  $p < 0.05$ , \*\*\*,  $p < 0.001$ .

A

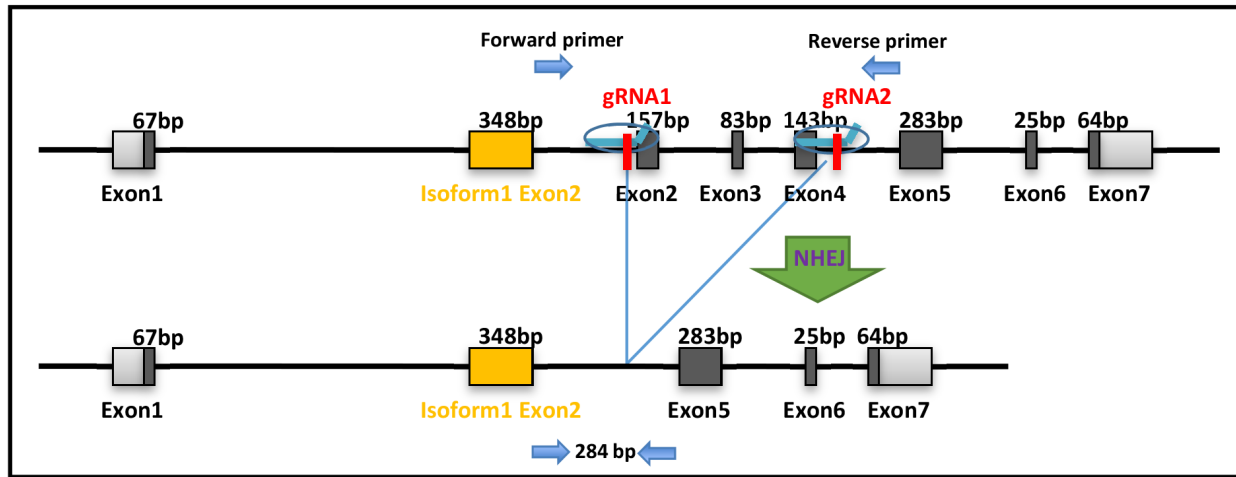

B

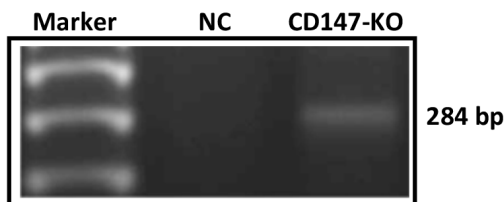

**Supplementary Figure S2: CRISPR/Cas9-mediated knockout of CD147.** A. Schematic diagram showing the sgRNA design targeting exon 2 – 4 of the mouse *CD147* gene. B. Genomic PCR showing the presence of recombined allele (284 bp after removal of exons 2 – 4) of *CD147* gene in sgRNA transfected cells (CD147-KO) but not the vector control transfected cells (NC).

Supplementary Table S1: Antibodies used in this study

| Name                                 | E <sup>A</sup> | Vendor                        | Catalog No. | Dilution                                   |
|--------------------------------------|----------------|-------------------------------|-------------|--------------------------------------------|
| Anti-CD147 (M6/1)                    | FB             | SCB*                          | sc-51591    | Testis: 40 µg/mL,<br>10 µL; Cell: 10 µg/mL |
| Anti-CD147 (G19)                     | WB             | SCB                           | sc-9757     | 1:500                                      |
| Anti-pro-caspase-3/cleaved caspase-3 | WB             | CST                           | 9662        | 1:1000                                     |
| Anti-cleaved caspase-3               | WB             | CST                           | 9664        | 1:1000                                     |
| Anti-pro-caspase-8                   | WB             | CST                           | 4927        | 1:1000                                     |
| Anti-cleaved caspase-8               | WB             | CST                           | 9429        | 1:1000                                     |
| Anti-PARP                            | WB             | SCB                           | sc-25780    | 1:500                                      |
| Anti-cleaved PARP                    | WB             | CST                           | 9544        | 1:1000                                     |
| Anti-TRAF2                           | WB             | CST                           | 4712        | 1:1000                                     |
| Anti-c-Myc                           | IP             | Provided by Dr. YU Siu<br>Bun | 25 µg       |                                            |
| Anti-c-Myc                           | WB             | CST                           | 2276        | 1:1000                                     |
| Anti-p105/p50                        | WB             | CST                           | 12540       | 1:1000                                     |
| Anti-p65                             | WB             | SCB                           | sc-109      | 1:500                                      |
| Anti-NIK                             | WB             | CST                           | 4994        | 1:1000                                     |
| Anti-p100/p52                        | WB             | CST                           | 4882        | 1:1000                                     |
| Anti-Rel B                           | WB             | CST                           | 4922        | 1:1000                                     |
| Anti-β-tubulin                       | WB             | SCB                           | sc-9104     | 1:1000                                     |
| Anti-β-actin                         | WB             | Sigma                         | A1978       | 1:2000                                     |

<sup>Δ</sup>Experiment, <sup>†</sup>Functional blocking, <sup>‡</sup>Western blot, \*Santa Cruz Biotechnology, #Cell Signaling Technology.
